# Supplementary material for: m6A regulator–mediated RNA methylation modification patterns and immune microenvironment infiltration characterization in patients with intracranial aneurysms
Source: Front Neurol. 2022 Aug 5;13:889141. doi: 10.3389/fneur.2022.889141 (PMC9389407; doi:10.3389/fneur.2022.889141)
Supplement: Supplementary file 17 [file Table_14.XLSX]

## Sheet: Sheet1
m6Aexp.R
#if (!requireNamespace("BiocManager", quietly = TRUE))
# install.packages("BiocManager")
#BiocManager::install("limma")
library(limma)
expFile="normalize.txt"
geneFile="gene.txt"
setwd("C:\\m6A\\m6aExp")
rt=read.table(expFile, header=T, sep="\t", check.names=F)
rt=as.matrix(rt)
rownames(rt)=rt[,1]
exp=rt[,2:ncol(rt)]
dimnames=list(rownames(exp),colnames(exp))
data=matrix(as.numeric(as.matrix(exp)),nrow=nrow(exp),dimnames=dimnames)
data=avereps(data)
data=data[rowMeans(data)>0,]
gene=read.table(geneFile, header=T, check.names=F, sep="\t")
sameGene=intersect(as.vector(gene[,1]), rownames(data))
geneExp=data[sameGene,]
out=rbind(ID=colnames(geneExp), geneExp)
write.table(out, file="m6aGeneExp.txt", sep="\t", quote=F, col.names=F)
heatmap.R
#if (!requireNamespace("BiocManager", quietly = TRUE))
# install.packages("BiocManager")
#BiocManager::install("limma")
#install.packages("pheatmap")
#install.packages("reshape2")
#install.packages("ggpubr")
library(limma)
library(pheatmap)
library(reshape2)
library(ggpubr)
expFile="m6aGeneExp.txt"
setwd("C:\\m6A\\08.diff")
rt=read.table(expFile, header=T, sep="\t", check.names=F)
rt=as.matrix(rt)
rownames(rt)=rt[,1]
exp=rt[,2:ncol(rt)]
dimnames=list(rownames(exp),colnames(exp))
data=matrix(as.numeric(as.matrix(exp)),nrow=nrow(exp),dimnames=dimnames)
data=avereps(data)
data=data[rowMeans(data)>0,]
exp=data
Type=gsub("(.*)\\_(.*)", "\\2", colnames(data))
sigVec=c()
sigGeneVec=c()
for(i in row.names(data)){
	test=wilcox.test(data[i,] ~ Type)
	pvalue=test$p.value
	Sig=ifelse(pvalue<0.001,"***",ifelse(pvalue<0.01,"**",ifelse(pvalue<0.05,"*","")))
	if(pvalue<0.05){
	sigVec=c(sigVec, paste0(i, Sig))
	sigGeneVec=c(sigGeneVec, i)}
}
data=data[sigGeneVec,]
outTab=rbind(ID=colnames(data), data)
write.table(outTab, file="diffGeneExp.txt", sep="\t", quote=F, col.names=F)
row.names(data)=sigVec
names(Type)=colnames(data)
Type=as.data.frame(Type)
pdf("heatmap.pdf", width=7.5, height=4.7)
pheatmap(data,
annotation=Type,
color = colorRampPalette(c(rep("blue",2), "white", rep("red",2)))(100),
cluster_cols =F,
cluster_rows =T,
scale="row",
show_colnames=F,
show_rownames=T,
fontsize=6,
fontsize_row=7,
fontsize_col=6)
dev.off()
exp=as.data.frame(t(exp))
exp=cbind(exp, Type=Type)
data=melt(exp, id.vars=c("Type"))
colnames(data)=c("Type", "Gene", "Expression")
p=ggboxplot(data, x="Gene", y="Expression", color = "Type",
	xlab="",
	ylab="Gene expression",
	legend.title="Type",
	palette = c("blue", "red"),
	width=1)
p=p+rotate_x_text(60)
p1=p+stat_compare_means(aes(group=Type),
	method="wilcox.test",
	symnum.args=list(cutpoints = c(0, 0.001, 0.01, 0.05, 1), symbols = c("***", "**", "*", " ")),
	label = "p.signif")
pdf(file="boxplot.pdf", width=7.5, height=5)
print(p1)
dev.off()
Rcircos.R
#install.packages("RCircos")
library("RCircos")
setwd("C:\\m6A\\10.Rcircos")
cytoBandIdeogram=read.table("refer.txt", header=T, sep="\t", check.names=F)
chr.exclude <- NULL
cyto.info <- cytoBandIdeogram
tracks.inside <- 4
tracks.outside <- 0
RCircos.Set.Core.Components(cyto.info, chr.exclude, tracks.inside, tracks.outside)
rcircos.params <- RCircos.Get.Plot.Parameters()
rcircos.params$text.size=0.8
rcircos.params$point.size=5
RCircos.Reset.Plot.Parameters(rcircos.params)
pdf(file="RCircos.pdf", width=8, height=8)
RCircos.Set.Plot.Area()
RCircos.Chromosome.Ideogram.Plot()
RCircos.Gene.Label.Data=read.table("Rcircos.geneLabel.txt", header=T, sep="\t", check.names=F)
name.col <- 4
side <- "in"
track.num <- 1
RCircos.Gene.Connector.Plot(RCircos.Gene.Label.Data, track.num, side)
track.num <- 2
RCircos.Gene.Name.Plot(RCircos.Gene.Label.Data, name.col, track.num, side)
dev.off()
#if (!requireNamespace("BiocManager", quietly = TRUE))
# install.packages("BiocManager")
#BiocManager::install("limma")
#install.packages("ggplot2")
#install.packages("ggpubr")
#install.packages("ggExtra")
#引用包
library(limma)
library(ggplot2)
library(ggpubr)
library(ggExtra)
corFilter=0.4
pvalueFilter=0.001
setwd("C:\\m6A\\11.cor")
rt=read.table("m6aGeneExp.txt", header=T, sep="\t", check.names=F)
rt=as.matrix(rt)
rownames(rt)=rt[,1]
exp=rt[,2:ncol(rt)]
dimnames=list(rownames(exp),colnames(exp))
data=matrix(as.numeric(as.matrix(exp)),nrow=nrow(exp),dimnames=dimnames)
data=avereps(data)
group=sapply(strsplit(colnames(data),"\\_"), "[", 2)
data=data[,group=="treat"]
geneRT=read.table("gene.txt", header=T, sep="\t", check.names=F, row.names=1)
gene1=row.names(geneRT)[geneRT[,1]=="erasers"]
gene2=row.names(geneRT)[geneRT[,1]=="writers"]
outTab=data.frame()
for(i in gene1){
	for(j in gene2){
		x=as.numeric(data[i,])
		y=as.numeric(data[j,])
		corT=cor.test(x, y, method = 'spearman')
		cor=corT$estimate
		pvalue=corT$p.value
		if((abs(cor)>corFilter) & (pvalue<pvalueFilter)){
			outTab=rbind(outTab, cbind(Gene1=i, Gene2=j, cor, pvalue))
			df1=as.data.frame(cbind(x,y))
			p1=ggplot(df1, aes(x, y)) +
				xlab(i)+ylab(j)+
				geom_point()+ geom_smooth(method="lm",formula = y ~ x) + theme_bw()+
				stat_cor(method = 'spearman', aes(x =x, y =y))
			p2=ggMarginal(p1, type = "density", xparams = list(fill = "orange"),yparams = list(fill = "blue"))
			pdf(file=paste0(i, "_", j, ".pdf"),width=5,height=4.8)
			print(p2)
			dev.off()
		}
	}
}
write.table(file="corResult.txt",outTab,sep="\t",quote=F,row.names=F)
#install.packages("caret")
#install.packages("DALEX")
#install.packages("ggplot2")
#install.packages("randomForest")
#install.packages("kernlab")
#install.packages("pROC")
library(caret)
library(DALEX)
library(ggplot2)
library(randomForest)
library(kernlab)
library(pROC)
set.seed(123)
inputFile="diffGeneExp.txt"
setwd("C:\\m6A\\12.model")
data=read.table(inputFile, header=T, sep="\t", check.names=F, row.names=1)
data=t(data)
group=gsub("(.*)\\_(.*)", "\\2", row.names(data))
data=as.data.frame(data)
data$Type=group
control=trainControl(method="repeatedcv", number = 5, savePredictions=TRUE)
mod_rf = train(Type ~ .,data = data, method='rf', trControl = control)
mod_svm=train(Type ~., data = data, method = "svmRadial", prob.model = TRUE, trControl=control)
p_fun=function(object, newdata){
	predict(object, newdata=newdata, type="prob")[,2]
}
yTest=ifelse(data$Type=="con", 0, 1)
explainer_rf=explain(mod_rf, label = "RF",
data = data, y = yTest,
predict_function = p_fun,
verbose = FALSE)
mp_rf=model_performance(explainer_rf)
explainer_svm=explain(mod_svm, label = "SVM",
data = data, y = yTest,
predict_function = p_fun,
verbose = FALSE)
mp_svm=model_performance(explainer_svm)
pdf(file="residual.pdf", width=6, height=6)
p1 <- plot(mp_rf, mp_svm)
print(p1)
dev.off()
pdf(file="boxplot.pdf", width=6, height=6)
p2 <- plot(mp_rf, mp_svm, geom = "boxplot")
print(p2)
dev.off()
pred1=predict(mod_rf, newx=data, type="prob")
pred2=predict(mod_svm, newx=data, type="prob")
roc1=roc(yTest, as.numeric(pred1[,2]))
roc2=roc(yTest, as.numeric(pred2[,2]))
ci1=ci.auc(roc1, method="bootstrap")
ci2=ci.auc(roc2, method="bootstrap")
pdf(file="ROC.pdf", width=5, height=5)
plot(roc1, print.auc=F, legacy.axes=T, main="", col="red")
plot(roc2, print.auc=F, legacy.axes=T, main="", col="blue", add=T)
legend('bottomright',
	c(paste0('RF: ',sprintf("%.03f",roc1$auc)),
	paste0('SVM: ',sprintf("%.03f",roc2$auc))),
	col=c("red","blue"), lwd=2, bty = 'n')
dev.off()
#install.packages("randomForest")
library(randomForest)
set.seed(123)
inputFile="diffGeneExp.txt"
setwd("C:\\m6A\\13.RF")
data=read.table(inputFile, header=T, sep="\t", check.names=F, row.names=1)
data=t(data)
group=gsub("(.*)\\_(.*)", "\\2", row.names(data))
rf=randomForest(as.factor(group)~., data=data, ntree=500)
pdf(file="forest.pdf", width=6, height=6)
plot(rf, main="Random forest", lwd=2)
dev.off()
optionTrees=which.min(rf$err.rate[,1])
optionTrees
rf2=randomForest(as.factor(group)~., data=data, ntree=optionTrees)
importance=importance(x=rf2)
pdf(file="geneImportance.pdf", width=6.2, height=5.8)
varImpPlot(rf2, main="")
dev.off()
rfGenes=importance[order(importance[,"MeanDecreaseGini"], decreasing = TRUE),]
rfGenes=names(rfGenes[rfGenes>2])
#rfGenes=names(rfGenes[1:5])
write.table(rfGenes, file="rfGenes.txt", sep="\t", quote=F, col.names=F, row.names=F)
sigExp=t(data[,rfGenes])
sigExpOut=rbind(ID=colnames(sigExp),sigExp)
write.table(sigExpOut, file="rfGeneExp.txt", sep="\t", quote=F, col.names=F)
#install.packages("rms")
#install.packages("rmda")
library(rms)
library(rmda)
inputFile="rfGeneExp.txt"
setwd("C:\\m6A\\14.Nomo")
data=read.table(inputFile, header=T, sep="\t", check.names=F, row.names=1)
data=t(data)
group=gsub("(.*)\\_(.*)", "\\2", row.names(data))
rt=cbind(as.data.frame(data), Type=group)
paste(colnames(data), collapse="+")
ddist=datadist(rt)
options(datadist="ddist")
lrmModel=lrm(Type~ FMR1+VIRMA+ZC3H13+YTHDF1+WTAP+RBM15B+ALKBH5+METTL16, data=rt, x=T, y=T)
nomo=nomogram(lrmModel, fun=plogis,
	fun.at=c(0.0001,0.1,0.3,0.5,0.7,0.9,0.99),
	lp=F, funlabel="Risk of Disease")
pdf("Nom.pdf", width=8, height=6)
plot(nomo)
dev.off()
cali=calibrate(lrmModel, method="boot", B=1000)
pdf("Calibration.pdf", width=6, height=6)
plot(cali,
	xlab="Predicted probability",
	ylab="Actual probability", sub=F)
dev.off()
rt$Type=ifelse(rt$Type=="con", 0, 1)
dc=decision_curve(Type ~ FMR1+VIRMA+ZC3H13+YTHDF1+WTAP+RBM15B+ALKBH5+METTL16, data=rt,
	family = binomial(link ='logit'),
	thresholds= seq(0,1,by = 0.01),
	confidence.intervals = 0.95)
pdf(file="DCA.pdf", width=6, height=6)
plot_decision_curve(dc,
	curve.names="m6A genes",
	xlab="Threshold probability",
	cost.benefit.axis=T,
	col="red",
	confidence.intervals=FALSE,
	standardize=FALSE)
dev.off()
pdf(file="clinical_impact.pdf", width=6, height=6)
plot_clinical_impact(dc,
	confidence.intervals=T,
	col = c("red", "blue"))
dev.off()
#if (!requireNamespace("BiocManager", quietly = TRUE))
# install.packages("BiocManager")
#BiocManager::install("ConsensusClusterPlus")
library(ConsensusClusterPlus)
expFile="diffGeneExp.txt"
workDir="C:\\m6A\\15.m6aCluster"
setwd(workDir)
data=read.table(expFile, header=T, sep="\t", check.names=F, row.names=1)
data=as.matrix(data)
group=sapply(strsplit(colnames(data),"\\_"), "[", 2)
data=data[,group=="treat"]
maxK=9
results=ConsensusClusterPlus(data,
maxK=maxK,
reps=50,
pItem=0.8,
pFeature=1,
title=workDir,
clusterAlg="pam",
distance="euclidean",
seed=123456,
plot="png")
clusterNum=3
cluster=results[[clusterNum]][["consensusClass"]]
cluster=as.data.frame(cluster)
colnames(cluster)=c("m6Acluster")
letter=c("A","B","C","D","E","F","G")
uniqClu=levels(factor(cluster$m6Acluster))
cluster$m6Acluster=letter[match(cluster$m6Acluster, uniqClu)]
outTab=cbind(t(data), cluster)
outTab=rbind(ID=colnames(outTab), outTab)
write.table(outTab, file="m6Acluster.txt", sep="\t", quote=F, col.names=F)
#if (!requireNamespace("BiocManager", quietly = TRUE))
# install.packages("BiocManager")
#BiocManager::install("limma")
#install.packages("pheatmap")
#install.packages("reshape2")
#install.packages("ggpubr")
library(limma)
library(pheatmap)
library(reshape2)
library(ggpubr)
clusterFile="m6Acluster.txt"
setwd("C:\\biowolf\\m6A\\16.m6ACluHeatmap")
rt=read.table(clusterFile, header=T, sep="\t", check.names=F, row.names=1)
rt=rt[order(rt$m6Acluster),]
data=t(rt[,1:(ncol(rt)-1),drop=F])
Type=rt[,ncol(rt),drop=F]
bioCol=c("#0066FF","#FF0000","#FF9900","#6E568C","#7CC767","#223D6C","#D20A13","#FFD121","#088247","#11AA4D")
ann_colors=list()
m6aCluCol=bioCol[1:length(levels(factor(Type$m6Acluster)))]
names(m6aCluCol)=levels(factor(Type$m6Acluster))
ann_colors[["m6Acluster"]]=m6aCluCol
pdf("heatmap.pdf", width=7, height=4.5)
pheatmap(data,
annotation=Type,
annotation_colors = ann_colors,
color = colorRampPalette(c(rep("blue",2), "white", rep("red",2)))(100),
cluster_cols =F,
cluster_rows =T,
scale="row",
show_colnames=F,
show_rownames=T,
fontsize=6,
fontsize_row=7,
fontsize_col=6)
dev.off()
data=melt(rt, id.vars=c("m6Acluster"))
colnames(data)=c("m6Acluster", "Gene", "Expression")
p=ggboxplot(data, x="Gene", y="Expression", color = "m6Acluster",
	ylab="Gene expression",
	xlab="",
	legend.title="m6Acluster",
	palette = m6aCluCol,
	width=1)
p=p+rotate_x_text(60)
p1=p+stat_compare_means(aes(group=m6Acluster),
	symnum.args=list(cutpoints = c(0, 0.001, 0.01, 0.05, 1), symbols = c("***", "**", "*", " ")),
	label = "p.signif")
pdf(file="boxplot.pdf", width=6, height=5)
print(p1)
dev.off()
#if (!requireNamespace("BiocManager", quietly = TRUE))
# install.packages("BiocManager")
#BiocManager::install("limma")
#install.packages("ggplot2")
library(limma)
library(ggplot2)
clusterFile="m6Acluster.txt"
setwd("C:\\biowolf\\m6A\\17.PCA")
rt=read.table(clusterFile, header=T, sep="\t", check.names=F, row.names=1)
data=rt[,1:(ncol(rt)-1),drop=F]
m6Acluster=as.vector(rt[,ncol(rt)])
data.pca=prcomp(data)
pcaPredict=predict(data.pca)
PCA=data.frame(PC1=pcaPredict[,1], PC2=pcaPredict[,2], m6Acluster=m6Acluster)
PCA.mean=aggregate(PCA[,1:2], list(m6Acluster=PCA$m6Acluster), mean)
bioCol=c("#0066FF","#FF0000","#FF9900","#6E568C","#7CC767","#223D6C","#D20A13","#FFD121","#088247","#11AA4D")
m6aCluCol=bioCol[1:length(levels(factor(m6Acluster)))]
veganCovEllipse<-function (cov, center = c(0, 0), scale = 1, npoints = 100) {
theta <- (0:npoints) * 2 * pi/npoints
Circle <- cbind(cos(theta), sin(theta))
t(center + scale * t(Circle %*% chol(cov)))
}
df_ell <- data.frame()
for(g in levels(factor(PCA$m6Acluster))){
df_ell <- rbind(df_ell, cbind(as.data.frame(with(PCA[PCA$m6Acluster==g,],
veganCovEllipse(cov.wt(cbind(PC1,PC2),
wt=rep(1/length(PC1),length(PC1)))$cov,
center=c(mean(PC1),mean(PC2))))), m6Acluster=g))
}
pdf(file="PCA.pdf", height=5, width=6.5)
ggplot(data = PCA, aes(PC1, PC2)) + geom_point(aes(color = m6Acluster)) +
	scale_colour_manual(name="m6Acluster", values =m6aCluCol)+
theme_bw()+
theme(plot.margin=unit(rep(1.5,4),'lines'))+
geom_path(data=df_ell, aes(x=PC1, y=PC2, colour=m6Acluster), size=1, linetype=2)+
annotate("text",x=PCA.mean$PC1, y=PCA.mean$PC2, label=PCA.mean$m6Acluster, cex=7)+
theme(panel.grid.major = element_blank(), panel.grid.minor = element_blank())
dev.off()
#if (!requireNamespace("BiocManager", quietly = TRUE))
# install.packages("BiocManager")
#BiocManager::install("limma")
#BiocManager::install("GSEABase")
#BiocManager::install("GSVA")
#install.packages("ggpubr")
library(reshape2)
library(ggpubr)
library(limma)
library(GSEABase)
library(GSVA)
expFile="normalize.txt"
gmtFile="immune.gmt"
clusterFile="m6Acluster.txt"
setwd("C:\\m6A\\18.ssGSEA")
rt=read.table(expFile, header=T, sep="\t", check.names=F)
rt=as.matrix(rt)
rownames(rt)=rt[,1]
exp=rt[,2:ncol(rt)]
dimnames=list(rownames(exp),colnames(exp))
data=matrix(as.numeric(as.matrix(exp)),nrow=nrow(exp),dimnames=dimnames)
data=avereps(data)
geneSets=getGmt(gmtFile, geneIdType=SymbolIdentifier())
ssgseaScore=gsva(data, geneSets, method='ssgsea', kcdf='Gaussian', abs.ranking=TRUE)
normalize=function(x){
return((x-min(x))/(max(x)-min(x)))}
ssgseaScore=normalize(ssgseaScore)
ssgseaOut=rbind(id=colnames(ssgseaScore), ssgseaScore)
write.table(ssgseaOut,file="ssGSEA.result.txt",sep="\t",quote=F,col.names=F)
cluster=read.table(clusterFile, header=T, sep="\t", check.names=F, row.names=1)
ssgseaScore=t(ssgseaScore)
sameSample=intersect(row.names(ssgseaScore), row.names(cluster))
ssgseaScore=ssgseaScore[sameSample,,drop=F]
cluster=cluster[sameSample,"m6Acluster",drop=F]
scoreCluster=cbind(ssgseaScore, cluster)
data=melt(scoreCluster, id.vars=c("m6Acluster"))
colnames(data)=c("m6Acluster", "Immune", "Fraction")
bioCol=c("#0066FF","#FF0000","#FF9900","#6E568C","#7CC767","#223D6C","#D20A13","#FFD121","#088247","#11AA4D")
bioCol=bioCol[1:length(levels(factor(data[,"m6Acluster"])))]
p=ggboxplot(data, x="Immune", y="Fraction", color="m6Acluster",
xlab="",
ylab="Immune infiltration",
legend.title="m6Acluster",
palette=bioCol)
p=p+rotate_x_text(50)
pdf(file="boxplot.pdf", width=8, height=6)
p+stat_compare_means(aes(group=m6Acluster),symnum.args=list(cutpoints = c(0, 0.001, 0.01, 0.05, 1), symbols = c("***", "**", "*", "")),label = "p.signif")
dev.off()
#if (!requireNamespace("BiocManager", quietly = TRUE))
# install.packages("BiocManager")
#BiocManager::install("limma")
#install.packages("pheatmap")
#install.packages("reshape2")
#install.packages("ggpubr")
library(limma)
library(pheatmap)
library(reshape2)
library(ggpubr)
clusterFile="m6Acluster.txt"
ssgseaFile="ssGSEA.result.txt"
setwd("C:\\m6A\\19.immHeatmap")
cluster=read.table(clusterFile, header=T, sep="\t", check.names=F, row.names=1)
cluster=cluster[,-ncol(cluster)]
ssgsea=read.table(ssgseaFile, header=T, sep="\t", check.names=F, row.names=1)
ssgsea=t(ssgsea)
sameSample=intersect(row.names(cluster), row.names(ssgsea))
cluster=cluster[sameSample,,drop=F]
ssgsea=ssgsea[sameSample,,drop=F]
cor=cor(ssgsea, cluster, method="spearman")
pdf(file="heatmap.pdf", width=7, height=4.5)
pheatmap(cor,
color = colorRampPalette(c(rep("blue",1), "white", rep("red",1)))(100),
cluster_cols =F,
cluster_rows =T,
display_numbers = T,
show_colnames=T,
show_rownames=T,
angle_col =45,
fontsize=6,
fontsize_row=7,
fontsize_col=6)
dev.off()
#if (!requireNamespace("BiocManager", quietly = TRUE))
# install.packages("BiocManager")
#BiocManager::install("limma")
#install.packages("pheatmap")
#install.packages("reshape2")
#install.packages("ggpubr")
library(limma)
library(pheatmap)
library(reshape2)
library(ggpubr)
gene="WTAP"
clusterFile="m6Acluster.txt"
ssgseaFile="ssGSEA.result.txt"
setwd("C:\\m6A\\20.geneImmune")
cluster=read.table(clusterFile, header=T, sep="\t", check.names=F, row.names=1)
ssgsea=read.table(ssgseaFile, header=T, sep="\t", check.names=F, row.names=1)
ssgsea=t(ssgsea)
sameSample=intersect(row.names(cluster), row.names(ssgsea))
cluster=cluster[sameSample,gene,drop=F]
ssgsea=ssgsea[sameSample,,drop=F]
rt=cbind(ssgsea, cluster)
rt[,gene]=ifelse(rt[,gene]>median(rt[,gene]), "High", "Low")
rt[,gene]=factor(rt[,gene], levels=c("Low", "High"))
data=melt(rt, id.vars=c(gene))
colnames(data)=c("Gene", "Immune", "Fraction")
bioCol=c("#0066FF","#FF0000","#FF9900","#6E568C","#7CC767","#223D6C","#D20A13","#FFD121","#088247","#11AA4D")
bioCol=bioCol[1:length(levels(factor(data[,"Gene"])))]
p=ggboxplot(data, x="Immune", y="Fraction", color="Gene",
xlab="",
ylab="Immune infiltration",
legend.title=gene,
palette=bioCol)
p=p+rotate_x_text(50)
pdf(file="boxplot.pdf", width=8, height=6.5)
p+stat_compare_means(aes(group=Gene),symnum.args=list(cutpoints = c(0, 0.001, 0.01, 0.05, 1), symbols = c("***", "**", "*", "")),label = "p.signif")
dev.off()
#if (!requireNamespace("BiocManager", quietly = TRUE))
# install.packages("BiocManager")
#BiocManager::install("limma")
#install.packages("VennDiagram")
library(limma)
library(VennDiagram)
logFCfilter=1
adj.P.Val.Filter=0.05
expFile="normalize.txt"
cluFile="m6Acluster.txt"
setwd("C:\\m6A\\21.clusterDiff")
rt=read.table(expFile, header=T, sep="\t", check.names=F)
rt=as.matrix(rt)
rownames(rt)=rt[,1]
exp=rt[,2:ncol(rt)]
dimnames=list(rownames(exp),colnames(exp))
data=matrix(as.numeric(as.matrix(exp)),nrow=nrow(exp),dimnames=dimnames)
data=avereps(data)
data=data[rowMeans(data)>0,]
cluster=read.table(cluFile, header=T, sep="\t", check.names=F, row.names=1)
sameSample=intersect(colnames(data), row.names(cluster))
data=data[,sameSample]
cluster=cluster[sameSample, "m6Acluster"]
geneList=list()
Type=as.vector(cluster)
design=model.matrix(~0+factor(Type))
colnames(design)=levels(factor(Type))
comp=combn(levels(factor(Type)), 2)
allDiffGenes=c()
for(i in 1:ncol(comp)){
	fit=lmFit(data, design)
	contrast=paste0(comp[2,i], "-", comp[1,i])
	#print(contrast)
	cont.matrix=makeContrasts(contrast, levels=design)
	fit2=contrasts.fit(fit, cont.matrix)
	fit2=eBayes(fit2)
	allDiff=topTable(fit2,adjust='fdr',number=200000)
	allDiffOut=rbind(id=colnames(allDiff),allDiff)
	write.table(allDiffOut, file=paste0(contrast, ".all.txt"), sep="\t", quote=F, col.names=F)
	diffSig=allDiff[with(allDiff, (abs(logFC)>logFCfilter & adj.P.Val < adj.P.Val.Filter )), ]
	diffSigOut=rbind(id=colnames(diffSig),diffSig)
	write.table(diffSigOut, file=paste0(contrast, ".diff.txt"), sep="\t", quote=F, col.names=F)
	geneList[[contrast]]=row.names(diffSig)
}
venn.plot=venn.diagram(geneList,filename=NULL,fill=rainbow(length(geneList)) )
pdf(file="venn.pdf", width=5, height=5)
grid.draw(venn.plot)
dev.off()
interGenes=Reduce(intersect,geneList)
write.table(file="interGene.txt",interGenes,sep="\t",quote=F,col.names=F,row.names=F)
interGeneExp=data[interGenes,]
interGeneExp=rbind(id=colnames(interGeneExp), interGeneExp)
write.table(interGeneExp, file="interGeneExp.txt", sep="\t", quote=F, col.names=F)
#install.packages("colorspace")
#install.packages("stringi")
#install.packages("ggplot2")
#install.packages("circlize")
#install.packages("RColorBrewer")
#install.packages("ComplexHeatmap")
#if (!requireNamespace("BiocManager", quietly = TRUE))
# install.packages("BiocManager")
#BiocManager::install("org.Hs.eg.db")
#BiocManager::install("DOSE")
#BiocManager::install("clusterProfiler")
#BiocManager::install("enrichplot")
library(clusterProfiler)
library(org.Hs.eg.db)
library(enrichplot)
library(ggplot2)
library(circlize)
library(RColorBrewer)
library(dplyr)
library(ComplexHeatmap)
pvalueFilter=0.05
qvalueFilter=0.05
colorSel="qvalue"
if(qvalueFilter>0.05){
	colorSel="pvalue"
}
ontology.col=c("#00AFBB", "#E7B800", "#90EE90")
setwd("C:\\m6A\\22.GO")
rt=read.table("interGene.txt", header=F, sep="\t", check.names=F)
genes=unique(as.vector(rt[,1]))
entrezIDs=mget(genes, org.Hs.egSYMBOL2EG, ifnotfound=NA)
entrezIDs=as.character(entrezIDs)
gene=entrezIDs[entrezIDs!="NA"]
#gene=gsub("c\\(\"(\\d+)\".*", "\\1", gene)
kk=enrichGO(gene=gene, OrgDb=org.Hs.eg.db, pvalueCutoff=1, qvalueCutoff=1, ont="all", readable=T)
GO=as.data.frame(kk)
GO=GO[(GO$pvalue<pvalueFilter & GO$qvalue<qvalueFilter),]
write.table(GO, file="GO.txt", sep="\t", quote=F, row.names = F)
showNum=10
if(nrow(GO)<30){
	showNum=nrow(GO)
}
pdf(file="barplot.pdf", width=10, height=7)
bar=barplot(kk, drop=TRUE, showCategory=showNum, label_format=30, split="ONTOLOGY", color=colorSel) + facet_grid(ONTOLOGY~., scale='free')
print(bar)
dev.off()
pdf(file="bubble.pdf", width=10, height=7)
bub=dotplot(kk, showCategory=showNum, orderBy="GeneRatio", label_format=30, split="ONTOLOGY", color=colorSel) + facet_grid(ONTOLOGY~., scale='free')
print(bub)
dev.off()
data=GO[order(GO$p.adjust),]
datasig=data[data$p.adjust<0.05,,drop=F]
BP = datasig[datasig$ONTOLOGY=="BP",,drop=F]
CC = datasig[datasig$ONTOLOGY=="CC",,drop=F]
MF = datasig[datasig$ONTOLOGY=="MF",,drop=F]
BP = head(BP,6)
CC = head(CC,6)
MF = head(MF,6)
data = rbind(BP,CC,MF)
main.col = ontology.col[as.numeric(as.factor(data$ONTOLOGY))]
BgGene = as.numeric(sapply(strsplit(data$BgRatio,"/"),'[',1))
Gene = as.numeric(sapply(strsplit(data$GeneRatio,'/'),'[',1))
ratio = Gene/BgGene
logpvalue = -log(data$pvalue,10)
logpvalue.col = brewer.pal(n = 8, name = "Reds")
f = colorRamp2(breaks = c(0,2,4,6,8,10,15,20), colors = logpvalue.col)
BgGene.col = f(logpvalue)
df = data.frame(GO=data$ID,start=1,end=max(BgGene))
rownames(df) = df$GO
bed2 = data.frame(GO=data$ID,start=1,end=BgGene,BgGene=BgGene,BgGene.col=BgGene.col)
bed3 = data.frame(GO=data$ID,start=1,end=Gene,BgGene=Gene)
bed4 = data.frame(GO=data$ID,start=1,end=max(BgGene),ratio=ratio,col=main.col)
bed4$ratio = bed4$ratio/max(bed4$ratio)*9.5
pdf("GO.circlize.pdf",width=10,height=10)
par(omi=c(0.1,0.1,0.1,1.5))
circos.par(track.margin=c(0.01,0.01))
circos.genomicInitialize(df,plotType="none")
circos.trackPlotRegion(ylim = c(0, 1), panel.fun = function(x, y) {
sector.index = get.cell.meta.data("sector.index")
xlim = get.cell.meta.data("xlim")
ylim = get.cell.meta.data("ylim")
circos.text(mean(xlim), mean(ylim), sector.index, cex = 0.8, facing = "bending.inside", niceFacing = TRUE)
}, track.height = 0.08, bg.border = NA,bg.col = main.col)
for(si in get.all.sector.index()) {
circos.axis(h = "top", labels.cex = 0.6, sector.index = si,track.index = 1,
major.at=seq(0,max(BgGene),by=100),labels.facing = "clockwise")
}
f = colorRamp2(breaks = c(-1, 0, 1), colors = c("green", "black", "red"))
circos.genomicTrack(bed2, ylim = c(0, 1),track.height = 0.1,bg.border="white",
panel.fun = function(region, value, ...) {
i = getI(...)
circos.genomicRect(region, value, ytop = 0, ybottom = 1, col = value[,2],
border = NA, ...)
circos.genomicText(region, value, y = 0.4, labels = value[,1], adj=0,cex=0.8,...)
})
circos.genomicTrack(bed3, ylim = c(0, 1),track.height = 0.1,bg.border="white",
panel.fun = function(region, value, ...) {
i = getI(...)
circos.genomicRect(region, value, ytop = 0, ybottom = 1, col = '#BA55D3',
border = NA, ...)
circos.genomicText(region, value, y = 0.4, labels = value[,1], cex=0.9,adj=0,...)
})
circos.genomicTrack(bed4, ylim = c(0, 10),track.height = 0.35,bg.border="white",bg.col="grey90",
panel.fun = function(region, value, ...) {
cell.xlim = get.cell.meta.data("cell.xlim")
cell.ylim = get.cell.meta.data("cell.ylim")
for(j in 1:9) {
y = cell.ylim[1] + (cell.ylim[2]-cell.ylim[1])/10*j
circos.lines(cell.xlim, c(y, y), col = "#FFFFFF", lwd = 0.3)
}
circos.genomicRect(region, value, ytop = 0, ybottom = value[,1], col = value[,2],
border = NA, ...)
#circos.genomicText(region, value, y = 0.3, labels = value[,1], ...)
})
circos.clear()
middle.legend = Legend(
labels = c('Number of Genes','Number of Select','Rich Factor(0-1)'),
type="points",pch=c(15,15,17),legend_gp = gpar(col=c('pink','#BA55D3',ontology.col[1])),
title="",nrow=3,size= unit(3, "mm")
)
circle_size = unit(1, "snpc")
draw(middle.legend,x=circle_size*0.42)
main.legend = Legend(
labels = c("Biological Process", "Molecular Function","Cellular Component"), type="points",pch=15,
legend_gp = gpar(col=ontology.col), title_position = "topcenter",
title = "ONTOLOGY", nrow = 3,size = unit(3, "mm"),grid_height = unit(5, "mm"),
grid_width = unit(5, "mm")
)
logp.legend = Legend(
labels=c('(0,2]','(2,4]','(4,6]','(6,8]','(8,10]','(10,15]','(15,20]','>=20'),
type="points",pch=16,legend_gp=gpar(col=logpvalue.col),title="-log10(Pvalue)",
title_position = "topcenter",grid_height = unit(5, "mm"),grid_width = unit(5, "mm"),
size = unit(3, "mm")
)
lgd = packLegend(main.legend,logp.legend)
circle_size = unit(1, "snpc")
print(circle_size)
draw(lgd, x = circle_size*0.85, y=circle_size*0.55,just = "left")
dev.off()
#install.packages("colorspace")
#install.packages("stringi")
#install.packages("ggplot2")
#if (!requireNamespace("BiocManager", quietly = TRUE))
# install.packages("BiocManager")
#BiocManager::install("org.Hs.eg.db")
#BiocManager::install("DOSE")
#BiocManager::install("clusterProfiler")
#BiocManager::install("enrichplot")
library("clusterProfiler")
library("org.Hs.eg.db")
library("enrichplot")
library("ggplot2")
pvalueFilter=0.05
qvalueFilter=0.05
colorSel="qvalue"
if(qvalueFilter>0.05){
	colorSel="pvalue"
}
setwd("C:\\m6A\\23.KEGG")
rt=read.table("interGene.txt", header=F, sep="\t", check.names=F)
genes=unique(as.vector(rt[,1]))
entrezIDs=mget(genes, org.Hs.egSYMBOL2EG, ifnotfound=NA)
entrezIDs=as.character(entrezIDs)
rt=data.frame(genes, entrezID=entrezIDs)
gene=entrezIDs[entrezIDs!="NA"]
#gene=gsub("c\\(\"(\\d+)\".*", "\\1", gene)
kk <- enrichKEGG(gene=gene, organism="hsa", pvalueCutoff=1, qvalueCutoff=1)
KEGG=as.data.frame(kk)
KEGG$geneID=as.character(sapply(KEGG$geneID,function(x)paste(rt$genes[match(strsplit(x,"/")[[1]],as.character(rt$entrezID))],collapse="/")))
KEGG=KEGG[(KEGG$pvalue<pvalueFilter & KEGG$qvalue<qvalueFilter),]
write.table(KEGG, file="KEGG.txt", sep="\t", quote=F, row.names = F)
showNum=30
if(nrow(KEGG)<showNum){
	showNum=nrow(KEGG)
}
pdf(file="barplot.pdf", width=9, height=7)
barplot(kk, drop=TRUE, showCategory=showNum, label_format=30, color=colorSel)
dev.off()
pdf(file="bubble.pdf", width = 9, height = 7)
dotplot(kk, showCategory=showNum, orderBy="GeneRatio", label_format=30, color=colorSel)
dev.off()
#if (!requireNamespace("BiocManager", quietly = TRUE))
# install.packages("BiocManager")
#BiocManager::install("limma")
#if (!requireNamespace("BiocManager", quietly = TRUE))
# install.packages("BiocManager")
#BiocManager::install("ConsensusClusterPlus")
library(limma)
library(ConsensusClusterPlus)
expFile="interGeneExp.txt"
workDir="C:\\m6A\\24.geneCluster"
setwd(workDir)
rt=read.table(expFile, header=T, sep="\t", check.names=F)
rt=as.matrix(rt)
rownames(rt)=rt[,1]
exp=rt[,2:ncol(rt)]
dimnames=list(rownames(exp), colnames(exp))
data=matrix(as.numeric(as.matrix(exp)), nrow=nrow(exp), dimnames=dimnames)
data=avereps(data)
data=data[rowMeans(data)>0,]
maxK=9
results=ConsensusClusterPlus(data,
maxK=maxK,
reps=50,
pItem=0.8,
pFeature=1,
title=workDir,
clusterAlg="km",
distance="euclidean",
seed=123456,
plot="png")
clusterNum=2
cluster=results[[clusterNum]][["consensusClass"]]
cluster=as.data.frame(cluster)
colnames(cluster)=c("geneCluster")
letter=c("A","B","C","D","E","F","G")
uniqClu=levels(factor(cluster$geneCluster))
cluster$geneCluster=letter[match(cluster$geneCluster, uniqClu)]
clusterOut=rbind(ID=colnames(cluster), cluster)
write.table(clusterOut, file="geneCluster.txt", sep="\t", quote=F, col.names=F)
#if (!requireNamespace("BiocManager", quietly = TRUE))
# install.packages("BiocManager")
#BiocManager::install("limma")
#install.packages("pheatmap")
library(limma)
library(pheatmap)
expFile="interGeneExp.txt"
setwd("C:\\biowolf\\m6A\\25.geneCluHeatmap")
exp=read.table(expFile, header=T, sep="\t", check.names=F, row.names=1)
exp=t(exp)
cluster=read.table(clusterFile, header=T, sep="\t", check.names=F, row.names=1)
sameSample=intersect(row.names(exp), row.names(cluster))
exp=exp[sameSample,,drop=F]
cluster=cluster[sameSample,,drop=F]
rt=cbind(exp, cluster)
rt=rt[order(rt$geneCluster),]
data=t(rt[,1:(ncol(rt)-1),drop=F])
Type=rt[,ncol(rt),drop=F]
bioCol=c("#0066FF","#FF0000","#FF9900","#6E568C","#7CC767","#223D6C","#D20A13","#FFD121","#088247","#11AA4D")
ann_colors=list()
geneCluCol=bioCol[1:length(levels(factor(Type$geneCluster)))]
names(geneCluCol)=levels(factor(Type$geneCluster))
ann_colors[["geneCluster"]]=geneCluCol
pdf(file="heatmap.pdf", width=8, height=6)
pheatmap(data,
annotation=Type,
annotation_colors = ann_colors,
color = colorRampPalette(c(rep("blue",2), "white", rep("red",2)))(100),
cluster_cols =F,
cluster_rows =T,
scale="row",
show_colnames=F,
show_rownames=T,
fontsize=6,
fontsize_row=1,
fontsize_col=6)
dev.off()
#if (!requireNamespace("BiocManager", quietly = TRUE))
# install.packages("BiocManager")
#BiocManager::install("limma")
#install.packages("pheatmap")
#install.packages("reshape2")
#install.packages("ggpubr")
library(limma)
library(pheatmap)
library(reshape2)
library(ggpubr)
expFile="diffGeneExp.txt"
clusterFile="geneCluster.txt"
setwd("C:\\m6A\\26.geneCluDiff")
exp=read.table(expFile, header=T, sep="\t", check.names=F, row.names=1)
exp=t(exp)
cluster=read.table(clusterFile, header=T, sep="\t", check.names=F, row.names=1
sameSample=intersect(row.names(exp), row.names(cluster))
exp=exp[sameSample,,drop=F]
cluster=cluster[sameSample,,drop=F]
rt=cbind(exp, cluster)
rt=rt[order(rt$geneCluster),]
data=melt(rt, id.vars=c("geneCluster"))
colnames(data)=c("geneCluster", "Gene", "Expression")
bioCol=c("#0066FF","#FF0000","#FF9900","#6E568C","#7CC767","#223D6C","#D20A13","#FFD121","#088247","#11AA4D")
bioCol=bioCol[1:length(levels(factor(data[,"geneCluster"])))]
p=ggboxplot(data, x="Gene", y="Expression", color = "geneCluster",
	xlab="",
	ylab="Gene expression",
	legend.title="geneCluster",
	palette = bioCol,
	width=1)
p=p+rotate_x_text(60)
p1=p+stat_compare_means(aes(group=geneCluster),
	symnum.args=list(cutpoints = c(0, 0.001, 0.01, 0.05, 1), symbols = c("***", "**", "*", " ")),
	label = "p.signif")
pdf(file="boxplot.pdf", width=7, height=5)
print(p1)
dev.off()
#if (!requireNamespace("BiocManager", quietly = TRUE))
# install.packages("BiocManager")
#BiocManager::install("limma")
#install.packages("ggpubr")
library(limma)
library(reshape2)
library(ggpubr)
clusterFile="geneCluster.txt"
ssgseaFile="ssGSEA.result.txt"
setwd("C:\\m6A\\27.geneCluImmune")
cluster=read.table(clusterFile, header=T, sep="\t", check.names=F, row.names=1)
ssgsea=read.table(ssgseaFile, header=T, sep="\t", check.names=F, row.names=1)
ssgsea=t(ssgsea)
sameSample=intersect(row.names(cluster), row.names(ssgsea))
cluster=cluster[sameSample, "geneCluster", drop=F]
ssgsea=ssgsea[sameSample, , drop=F]
scoreCluster=cbind(ssgsea, cluster)
data=melt(scoreCluster, id.vars=c("geneCluster"))
colnames(data)=c("geneCluster", "Immune", "Fraction")
bioCol=c("#0066FF","#FF0000","#FF9900","#6E568C","#7CC767","#223D6C","#D20A13","#FFD121","#088247","#11AA4D")
bioCol=bioCol[1:length(levels(factor(data[,"geneCluster"])))]
p=ggboxplot(data, x="Immune", y="Fraction", color="geneCluster",
xlab="",
ylab="Immune infiltration",
legend.title="geneCluster",
palette=bioCol)
p=p+rotate_x_text(50)
pdf(file="boxplot.pdf", width=8, height=6)
p+stat_compare_means(aes(group=geneCluster),symnum.args=list(cutpoints = c(0, 0.001, 0.01, 0.05, 1), symbols = c("***", "**", "*", "")),label = "p.signif")
dev.off()
expFile="diffGeneExp.txt"
setwd("C:\\m6A\\28.PCAscore")
data=read.table(expFile, header=T, sep="\t", check.names=F, row.names=1)
data=t(data)
pca=prcomp(data, scale=TRUE)
value=predict(pca)
m6Ascore=value[,1]+value[,2]
m6Ascore=as.data.frame(m6Ascore)
scoreOut=rbind(id=colnames(m6Ascore), m6Ascore)
write.table(scoreOut, file="m6Ascore.txt", sep="\t", quote=F, col.names=F)
#if (!requireNamespace("BiocManager", quietly = TRUE))
# install.packages("BiocManager")
#BiocManager::install("limma")
#install.packages("ggpubr")
library(limma)
library(ggpubr)
m6aCluFile="m6Acluster.txt"
geneCluFile="geneCluster.txt"
scoreFile="m6Ascore.txt"
setwd("C:\\m6A\\29.clusterScore")
m6aClu=read.table(m6aCluFile, header=T, sep="\t", check.names=F, row.names=1)
geneClu=read.table(geneCluFile, header=T, sep="\t", check.names=F, row.names=1)
score=read.table(scoreFile, header=T, sep="\t", check.names=F, row.names=1)
twoCluster=cbind(m6aClu, geneClu)
sameSample=intersect(row.names(twoCluster), row.names(score))
data=cbind(score[sameSample,,drop=F], twoCluster[sameSample,c("m6Acluster","geneCluster"),drop=F])
data$m6Acluster=factor(data$m6Acluster, levels=levels(factor(data$m6Acluster)))
group=levels(factor(data$m6Acluster))
comp=combn(group, 2)
my_comparisons=list()
for(i in 1:ncol(comp)){my_comparisons[[i]]<-comp[,i]}
bioCol=c("#0066FF","#FF9900","#FF0000","#6E568C","#7CC767","#223D6C","#D20A13","#FFD121","#088247","#11AA4D")
bioCol=bioCol[1:length(levels(factor(data$m6Acluster)))]
boxplot=ggboxplot(data, x="m6Acluster", y="m6Ascore", color="m6Acluster",
			xlab="m6Acluster",
			ylab="m6Ascore",
			legend.title="m6Acluster",
			palette=bioCol,
			add = "jitter")+
	stat_compare_means(comparisons = my_comparisons)
pdf(file="m6Acluster.pdf", width=5, height=4.5)
print(boxplot)
dev.off()
#######m6A分型与PCA打分的相关性########
data$geneCluster=factor(data$geneCluster, levels=levels(factor(data$geneCluster)))
group=levels(factor(data$geneCluster))
comp=combn(group, 2)
my_comparisons=list()
for(i in 1:ncol(comp)){my_comparisons[[i]]<-comp[,i]}
bioCol=c("#0066FF","#FF9900","#FF0000","#6E568C","#7CC767","#223D6C","#D20A13","#FFD121","#088247","#11AA4D")
bioCol=bioCol[1:length(levels(factor(data$geneCluster)))]
boxplot=ggboxplot(data, x="geneCluster", y="m6Ascore", color="geneCluster",
			xlab="geneCluster",
			ylab="m6Ascore",
			legend.title="geneCluster",
			palette=bioCol,
			add = "jitter")+
	stat_compare_means(comparisons = my_comparisons)
pdf(file="geneCluster.pdf", width=5, height=4.5)
print(boxplot)
dev.off()
#install.packages("ggplot2")
#install.packages("ggalluvial")
library(ggalluvial)
library(ggplot2)
library(dplyr)
m6aCluFile="m6Acluster.txt"
geneCluFile="geneCluster.txt"
scoreFile="m6Ascore.txt"
setwd("C:\\m6A\\30.ggalluvial")
m6aClu=read.table(m6aCluFile, header=T, sep="\t", check.names=F, row.names=1)
geneClu=read.table(geneCluFile, header=T, sep="\t", check.names=F, row.names=1)
score=read.table(scoreFile, header=T, sep="\t", check.names=F, row.names=1)
twoCluster=cbind(m6aClu, geneClu)
sameSample=intersect(row.names(twoCluster), row.names(score))
rt=cbind(twoCluster[sameSample,c("m6Acluster","geneCluster"),drop=F], score[sameSample,,drop=F])
rt$m6Ascore=ifelse(rt$m6Ascore>0, "High", "Low")
corLodes=to_lodes_form(rt, axes = 1:ncol(rt), id = "Cohort")
pdf(file="ggalluvial.pdf", width=6, height=6)
mycol=rep(c("#0066FF","#FF0000","#FF9900","#029149","#6E568C","#E0367A","#D8D155","#223D6C","#D20A13","#431A3D","#91612D","#FFD121","#088247","#11AA4D","#58CDD9","#7A142C","#5D90BA","#64495D","#7CC767"),15)
ggplot(corLodes, aes(x = x, stratum = stratum, alluvium = Cohort,fill = stratum, label = stratum)) +
	scale_x_discrete(expand = c(0, 0)) +
	geom_flow(width = 2/10, aes.flow = "forward") +
	geom_stratum(alpha = .9,width = 2/10) +
	scale_fill_manual(values = mycol) +
	geom_text(stat = "stratum", size = 3,color="black") +
	xlab("") + ylab("") + theme_bw() +
	theme(axis.line = element_blank(),axis.ticks = element_blank(),axis.text.y = element_blank()) + #去掉坐标轴
	theme(panel.grid =element_blank()) +
	theme(panel.border = element_blank()) +
	ggtitle("") + guides(fill = FALSE)
dev.off()
#if (!requireNamespace("BiocManager", quietly = TRUE))
# install.packages("BiocManager")
#BiocManager::install("limma")
#install.packages("ggpubr")
#install.packages("reshape2")
library(limma)
library(reshape2)
library(ggpubr)
expFile="normalize.txt"
geneFile="gene.txt"
m6aCluFile="m6Acluster.txt"
geneCluFile="geneCluster.txt"
setwd("C:\\m6A\\31.geneDiff")
rt=read.table(expFile, header=T, sep="\t", check.names=F)
rt=as.matrix(rt)
rownames(rt)=rt[,1]
exp=rt[,2:ncol(rt)]
dimnames=list(rownames(exp),colnames(exp))
data=matrix(as.numeric(as.matrix(exp)),nrow=nrow(exp),dimnames=dimnames)
data=avereps(data)
data=data[rowMeans(data)>0,]
gene=read.table(geneFile, header=F, check.names=F, sep="\t")
sameGene=intersect(as.vector(gene[,1]), rownames(data))
geneExp=t(data[sameGene,])
m6aClu=read.table(m6aCluFile, header=T, sep="\t", check.names=F, row.names=1)
geneClu=read.table(geneCluFile, header=T, sep="\t", check.names=F, row.names=1)
twoCluster=cbind(m6aClu, geneClu)
sameSample=intersect(row.names(twoCluster), row.names(geneExp))
m6aCluData=cbind(geneExp[sameSample,,drop=F], twoCluster[sameSample,"m6Acluster",drop=F])
geneCluData=cbind(geneExp[sameSample,,drop=F], twoCluster[sameSample,"geneCluster",drop=F])
data=melt(m6aCluData, id.vars=c("m6Acluster"))
colnames(data)=c("m6Acluster", "Gene", "Expression")
bioCol=c("#0066FF","#FF0000","#FF9900","#6E568C","#7CC767","#223D6C","#D20A13","#FFD121","#088247","#11AA4D")
bioCol=bioCol[1:length(levels(factor(data[,"m6Acluster"])))]
p=ggboxplot(data, x="Gene", y="Expression", color="m6Acluster",
xlab="",
ylab="Gene expression",
legend.title="m6Acluster",
palette=bioCol)
p=p+rotate_x_text(50)
pdf(file="boxplot.m6aClu.pdf", width=6, height=5)
p+stat_compare_means(aes(group=m6Acluster),symnum.args=list(cutpoints = c(0, 0.001, 0.01, 0.05, 1), symbols = c("***", "**", "*", "")),label = "p.signif")
dev.off()
data=melt(geneCluData, id.vars=c("geneCluster"))
colnames(data)=c("geneCluster", "Gene", "Expression")
bioCol=c("#0066FF","#FF0000","#FF9900","#6E568C","#7CC767","#223D6C","#D20A13","#FFD121","#088247","#11AA4D")
bioCol=bioCol[1:length(levels(factor(data[,"geneCluster"])))]
p=ggboxplot(data, x="Gene", y="Expression", color="geneCluster",
xlab="",
ylab="Gene expression",
legend.title="geneCluster",
palette=bioCol)
p=p+rotate_x_text(50)
pdf(file="boxplot.geneClu.pdf", width=6, height=5)
p+stat_compare_means(aes(group=geneCluster),symnum.args=list(cutpoints = c(0, 0.001, 0.01, 0.05, 1), symbols = c("***", "**", "*", "")),label = "p.signif")
dev.off()
